# Supplementary material for: The Recognition of Sweat Latent Fingerprints with Green-Emitting Carbon Dots
Source: MDPI journal article supplement (doi:10.3390/nano8080612), 2018-08-12
Supplement: s1 [file s1]

# Supplementary Material

## The Recognition of Sweat Latent Fingerprints with Green-emitting Carbon Dots

Dan Zhao<sup>1,2,†</sup>, Wenting Ma<sup>1,2,†</sup>, Xincan Xiao<sup>1,2,\*</sup>

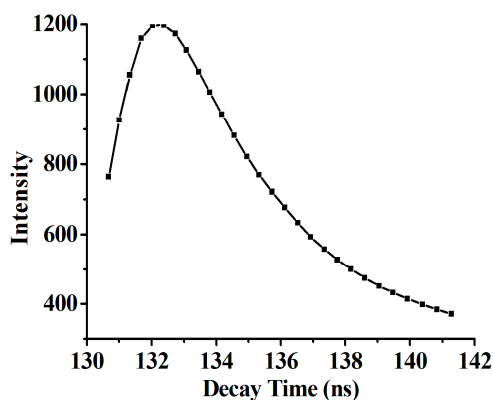

**Figure S1.** Fluorescence decay curve of green-emitted carbon dots (G-CDs).

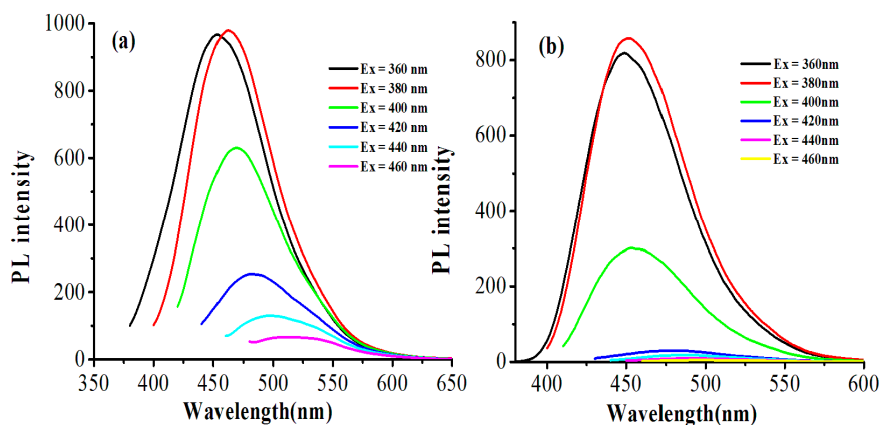

**Figure S2.** Fluorescence spectra of G-CDs and B-CDs at different excitation wavelengths. (a) G-CDs; (b) B-CDs.

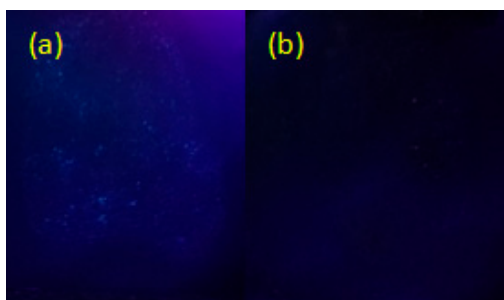

**Figure S3.** Diagrams of fingerprints on the tin foil paper developed by various quantum dots (QDs). (a) Blue-emitted carbon dots (P-B-CDs); (b) Yellow-emitted carbon dots (Y-CDs).

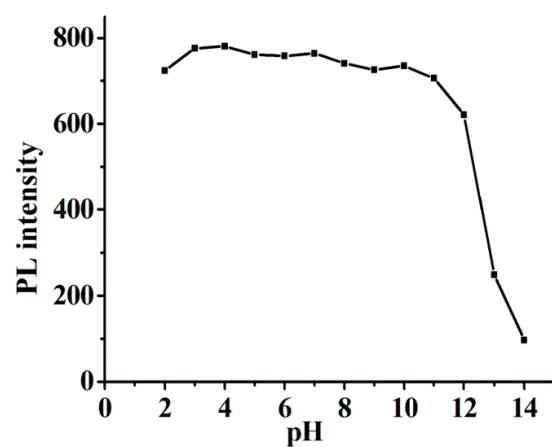

**Figure S4.** Fluorescence properties by G-CDs of various pH values.

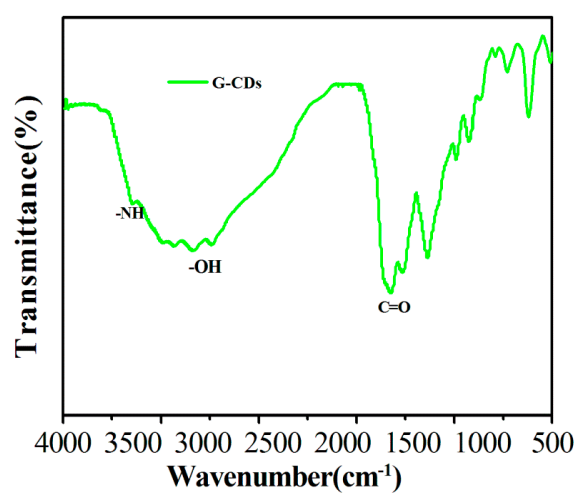

**Figure S5.** FTIR spectrum of the G-CDs.
